# Supplementary material
Source: Springer Nature journal article supplement (https://www.springermedizin.de/resource/supplementary/12865_2008_257_MOESM5_ESM.pdf/9427614)

|        | Pro | Pre | Imm | Pro | Pre | Imm |
|--------|-----|-----|-----|-----|-----|-----|
| Ligase | -   | -   | -   | +   | +   | +   |

CD14

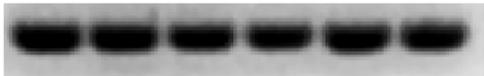

V $\kappa$ 6 cRS

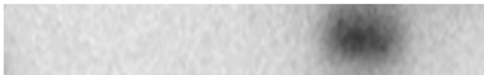

Supplement: MOESM5 [file 9427614]
